# Supplementary material for: Annual Cycle and Migration Strategies of a Trans-Saharan Migratory Songbird: A Geolocator Study in the Great Reed Warbler
Source: PLoS One. 2013 Oct 18;8(10):e79209. doi: 10.1371/journal.pone.0079209 (PMC3799637; doi:10.1371/journal.pone.0079209)
Supplement: Table S1 — Sun angles for different stages during the year for each individual. Breeding site before autumn migration (Sweden (departure)), autumn migration, wintering site after autumn migration until change to next wintering site (autumn equinox), second wintering site before spring migration (spring equinox), spring migration, and breeding site after spring migration (Sweden (arrival)) are given. (XLSX) [file pone.0079209.s002.xlsx]

## Sheet: Blad1
Table S1. Sun angles for different stages during the year for each individual: breeding site before autumn migration (Sweden (departure)), autumn migration, wintering site after autumn migration until change to next wintering site (autumn equinox), second wintering site before spring migration (spring equinox), spring migration, and breeding site after spring migration (Sweden (arrival)).
	Sun angles
Individual	Sweden (departure)	Autumn migration	Autumn equinox	Spring equinox	Spring migration	Sweden (arrival)
1V-93	-2.5	-4	-6.5	-4	-4	-4
5V-88	-3.5	-3.5	-5	-3.5	-3.5	-3.5
7V-50	-3	-3	-6	-3.5	-3.5	-3.5
7V-77	-2.5	-6	-6	-5	-4	-4
H1-25	-3	-4.5	-4.5	-4	-4	-4
9H-50	-4	-4	-6	-6.5	-5	-5
7V-72	-3.5	-4.5	ND	ND	ND	ND
7V-89	-4	-5.5	-5.5	ND	ND	ND
1V-74	-4	-5.5	-5.5	-4.5	ND	ND
1V-87	-4	-4.5*	ND	ND	ND	ND
total mean	-3.4	-4.5	-5.6	-4.4	-4	-4
* The mean sun angle of all other individuals for this stage is taken since Hill–Ekstrom method could not be applied in this particular case.
