# Supplementary material for: Annual Cycle and Migration Strategies of a Trans-Saharan Migratory Songbird: A Geolocator Study in the Great Reed Warbler
Source: PLoS One. 2013 Oct 18;8(10):e79209. doi: 10.1371/journal.pone.0079209 (PMC3799637; doi:10.1371/journal.pone.0079209)
Supplement: Table S2 — Accuracy of geolocator position data at the breeding site based on distances between measured and known geographical positions. (XLSX) [file pone.0079209.s003.xlsx]

## Sheet: Blad1
Table S2. Error distances (km) of geolocator position data at the breeding site based on distances between measured and known geographical positions.
Individual	N fixes	Mean	Median	SD	Min	Max
1V-74	105	167.2	126.3	230.7	17.9	1590.4
1V-87	96	1006.1	135.1	2222.1	8.7	9308.4
1V-87*	87	290.9	107.1	424.4	8.7	2682.6
1V-93	64	102.0	93.3	58.3	5.3	237.0
5V-88	46	126.1	118.3	63.9	22.7	314.6
7V-50	35	114.8	93.2	86.7	11.9	382.9
7V-72	20	107.9	94.1	51.9	45.3	253.4
7V-77	112	147.9	132.7	73.7	22.4	338.0
7V-89	57	65.1	62.9	41.6	6.5	183.7
9H-50	60	64.5	59.9	33.4	5.4	135.6
H1-25	43	155.6	123.2	99.2	25.2	364.8
Total mean	63.8	205.7	103.9	296.1	17.1	1310.9
Total mean*	62.9	134.2	101.1	116.4	17.1	648.3
* Values for 1V-87 and total mean after removing 9 data points that were obvious outliers (see text for details).
